# Supplementary material for: Chemotherapeutic Treatments Increase PD-L1 Expression in Esophageal Squamous Cell Carcinoma through EGFR/ERK Activation
Source: PubMed Central journal article supplement — Transl Oncol. 2018 Aug 31;11(6):1323–33. doi: 10.1016/j.tranon.2018.08.005 (PMC6122398; doi:10.1016/j.tranon.2018.08.005), 2018-08-31
Supplement: mmc1.pdf [file mmc1.pdf]

## Supplementary Data

| Table S1. sgRNA target sequences and the cloning primers sequence for EGFR knock-down |                              |                                 |                                 |
|---------------------------------------------------------------------------------------|------------------------------|---------------------------------|---------------------------------|
|                                                                                       | <b>sgRNA target sequence</b> | <b>Cloning primers sequence</b> |                                 |
| sg1                                                                                   | TGTCACCCACATAATTACCTG        | Fwd                             | 5'CACCGTGTCCACCCACATAATTACCTG3' |
|                                                                                       |                              | Rev                             | 5'AAACCAGGTAATTATGTGGTGACAC3'   |
| sg2                                                                                   | GTGGAGCCTCTTACACCCAG         | Fwd                             | 5'CACCGGTGGAGCCTCTTACACCCAG3'   |
|                                                                                       |                              | Rev                             | 5'AAACCTGGGTGTAAGAGGCTCCACC3'   |
| sg3                                                                                   | GAGAACCTAGAAATCATACG         | Fwd                             | 5'CACCGGAGAACCTAGAAATCATACG3'   |
|                                                                                       |                              | Rev                             | 5'AAACCGTATGATTTCTAGGTTCTCC3'   |

| Table S2. List of antibodies used in immunohistochemical (IHC) staining and Western blotting |        |                  |                |                  |          |
|----------------------------------------------------------------------------------------------|--------|------------------|----------------|------------------|----------|
| Target                                                                                       | Clone  | Application      | Source         | Catalogue number | Dilution |
| PD-L1                                                                                        | E1L3N  | IHC              | Cell Signaling | #13684           | 1:100    |
|                                                                                              |        | Western blotting | Cell Signaling | #13684           | 1:1000   |
| p84                                                                                          | 5E10   | Western blotting | Genetex        | GTX70220         | 1:1000   |
| pEGFR(Y1068)                                                                                 | D7A5   | Western blotting | Cell Signaling | #3777            | 1:1000   |
| EGFR                                                                                         | D38B1  | Western blotting | Cell Signaling | #4267            | 1:1000   |
| pERK(T202/Y204)                                                                              |        | Western blotting | Cell Signaling | #9101            | 1:1000   |
| ERK                                                                                          | L34F12 | Western blotting | Cell Signaling | #4696            | 1:1000   |

Table S3. Clinical information for the commercial TMA study.

|                                          |             |
|------------------------------------------|-------------|
| <b>Age</b><br>(median; years old)        | 65.4        |
| <b>Gender</b>                            |             |
| Male                                     | 38 (20.2%)  |
| Female                                   | 150 (79.8%) |
| <b>Survival Status</b>                   |             |
| Deceased                                 | 133 (70.7%) |
| Alive                                    | 55 (29.3%)  |
| <b>Survival time</b><br>(median; months) | 27          |

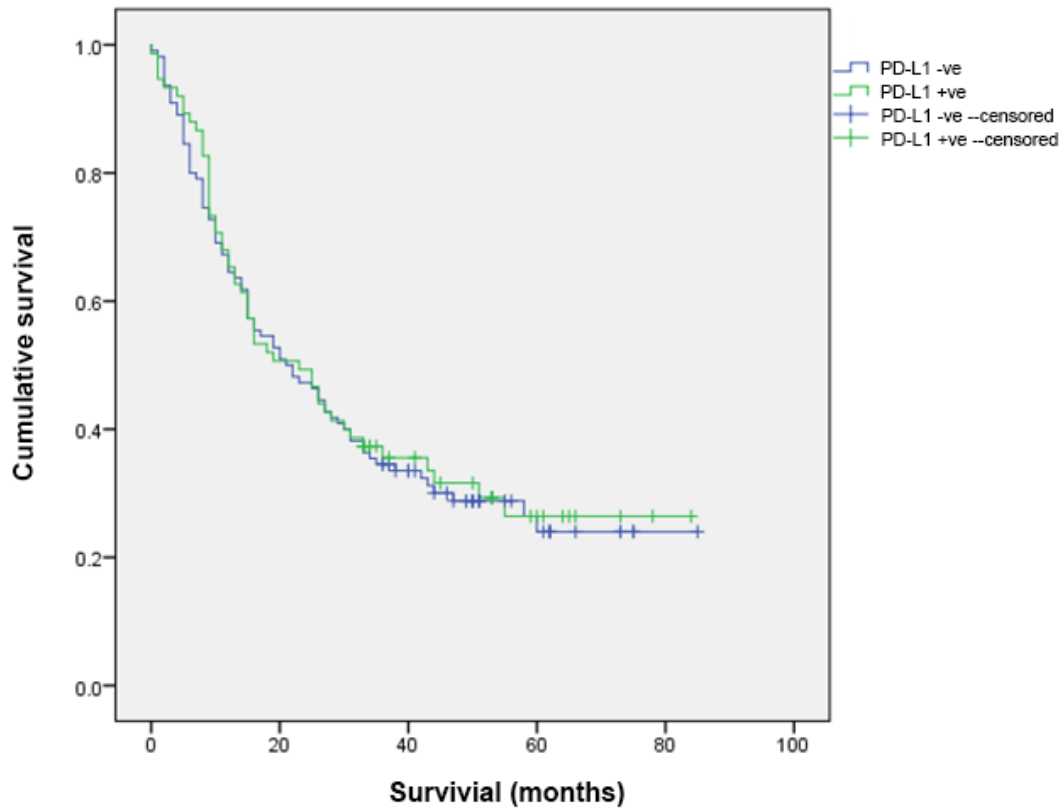

Supplementary Figure 1. Survival analysis with Kaplan-Meier curve shows that the positivity of PD-L1 expression in ESCC did not correlate with patients' survival ( $p$ -value=0.787)

**A**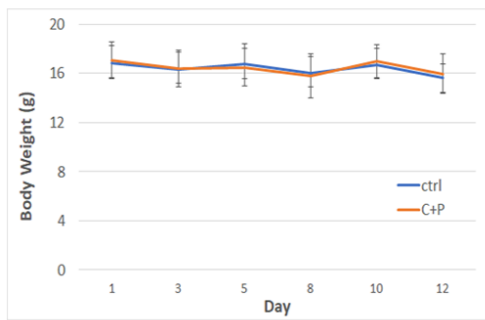**B**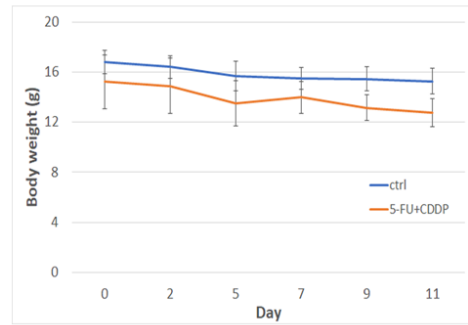**C**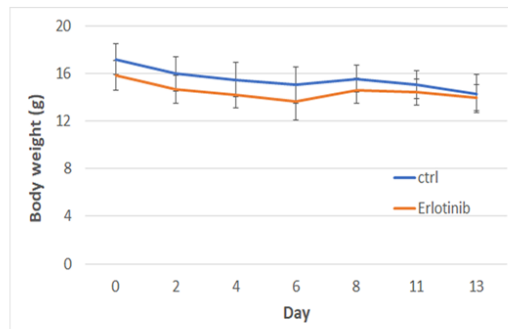

Supplementary Figure 2. Effect of chemotherapy and Erlotinib treatment on mice growth. All the treatments, which were (A) carboplatin plus paclitaxel, (B) 5-FU plus cisplatin and (C) Erlotinib, did not cause significant change in mice growth, as reflected by the body weight.

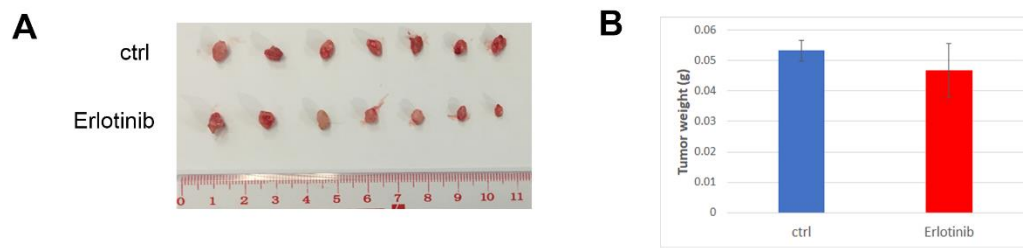

Supplementary Figure 3. Erlotinib treatment did not cause a significant tumor shrinkage, as demonstrated by (A) tumor size and (B) tumor weight.
